# Supplementary material
Source: PubMed Central journal article supplement (PMC1914206)
Supplement: plntphys_pp.106.086959_7.pdf [file plntphys_pp.106.086959_7.pdf]

## SUPPLEMENTAL FIGURE LEGENDS

**Supplemental Figure 1.** Changes in  $[Ca^{2+}]_{cyt}$  triggered in soybean cells by treatment with  $10^{-6}M$  NodBj-V (C<sub>18:1</sub>, MeFuc), followed after 15 min by treatment with the *G. margarita* medium. Arrows indicate the time of elicitor addition.

**Supplemental Figure 2.** Comparison of the  $Ca^{2+}$  responses triggered in soybean cells by the germinating spore medium of *Glomus intraradices* (black trace) and *Gl. mosseae* (grey trace). Addition is indicated by arrow.

**Supplemental Figure 3.** Monitoring of  $[Ca^{2+}]_{cyt}$  in soybean cells treated with *G. margarita* medium harvested between 8 and 16 days of spore germination. Addition is indicated by arrow.

**Supplemental Fig. 4.** Monitoring of  $[Ca^{2+}]_{cyt}$  in soybean cells treated (arrow) with the medium of *G. margarita* spores kept at 4°C for 7 days to inhibit germination.

**Supplemental Figure 5.**  $Ca^{2+}$  traces induced in soybean cells by the medium of *G. margarita* spores germinated alone (black trace) or in coculture with plant cells (grey trace).

**Supplemental Figure 6.** Effect of the  $Ca^{2+}$  channel blocker  $La^{3+}$  on the expression of *DMI*-related genes. Relative percentage of inhibition of gene induction in response to *G. margarita* medium in soybean cells pretreated with 1.5 mM  $La^{3+}$ . Bars represent SEM.
