# Supplementary material
Source: PubMed Central journal article supplement (PMC1914206)

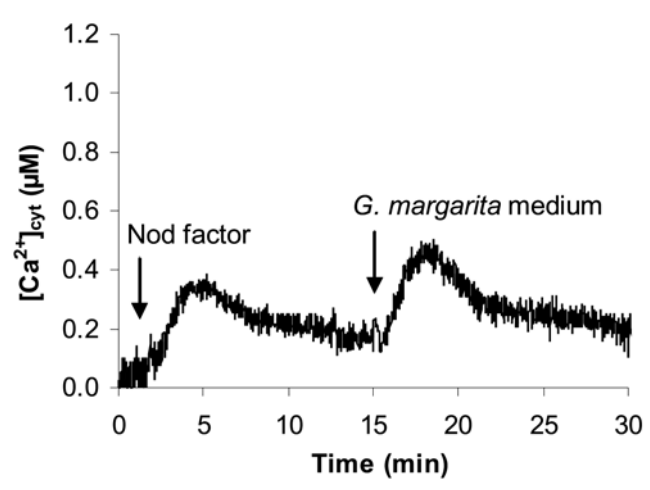

Supplement: plntphys_pp.106.086959_1.pdf [file plntphys_pp.106.086959_1.pdf]

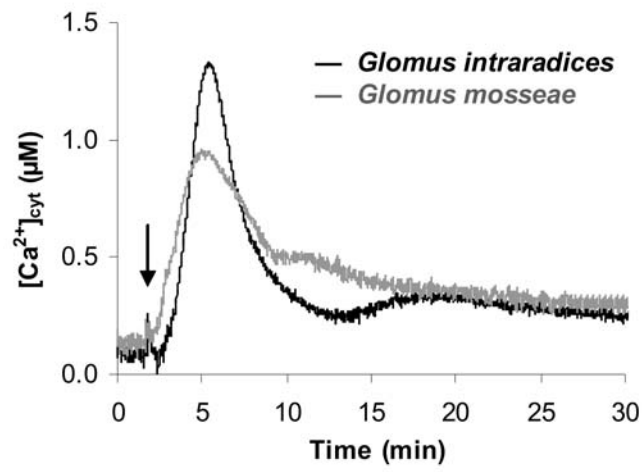

Supplement: plntphys_pp.106.086959_2.pdf [file plntphys_pp.106.086959_2.pdf]

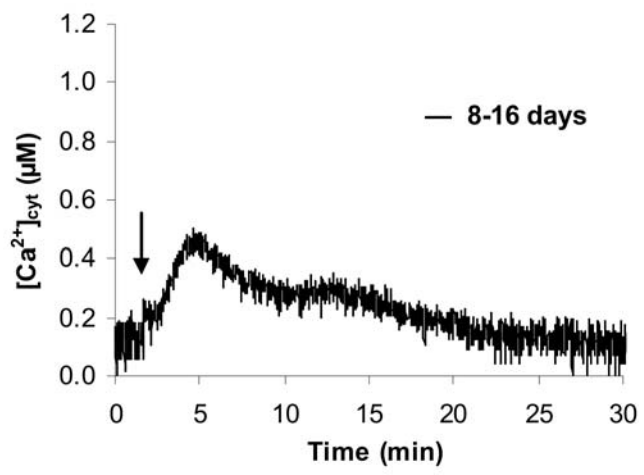

Supplement: plntphys_pp.106.086959_3.pdf [file plntphys_pp.106.086959_3.pdf]

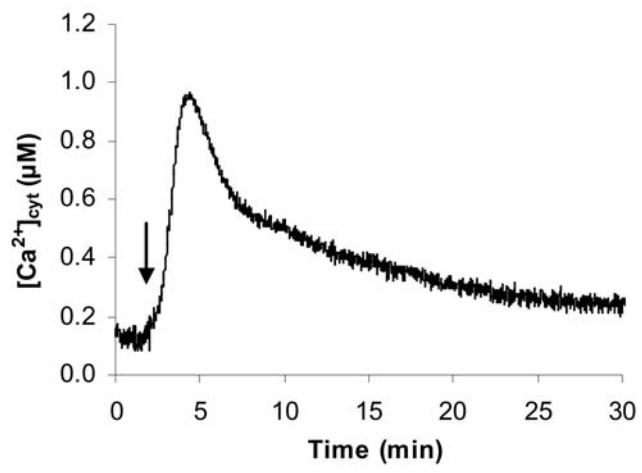

Supplement: plntphys_pp.106.086959_4.pdf [file plntphys_pp.106.086959_4.pdf]

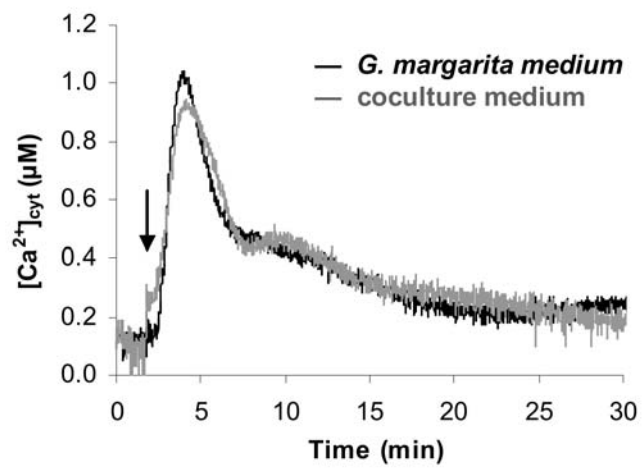

Supplement: plntphys_pp.106.086959_5.pdf [file plntphys_pp.106.086959_5.pdf]

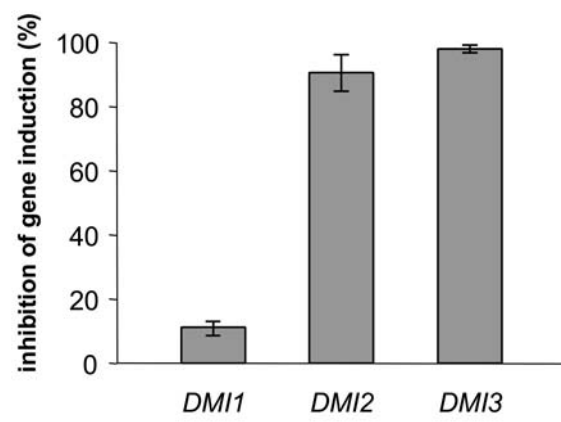

Supplement: plntphys_pp.106.086959_6.pdf [file plntphys_pp.106.086959_6.pdf]
